# Supplementary material for: Further Evidence of Inadequate Quality in Lateral Flow Devices Commercially Offered for the Diagnosis of Rabies
Source: MDPI journal article supplement (doi:10.3390/tropicalmed5010013), 2020-01-18
Supplement: s1 [file s1]

| Lab       | LabelingID                                                | host                        | virus | Strain                                    | origin                         | SEX        | offspring/longevity | Viral load       | InterMedical | Antigen/Biomarkers | Antigen/Biomarkers modified | Endobacteria   | Relative Ag (from Source) | Latitude   |
|-----------|-----------------------------------------------------------|-----------------------------|-------|-------------------------------------------|--------------------------------|------------|---------------------|------------------|--------------|--------------------|-----------------------------|----------------|---------------------------|------------|
| AKG01     | DB-1760                                                   | fox                         | -     | -                                         | Luxembourg                     | neg        | no CI               |                  | neg          | neg                |                             | not tested     | neg                       | neg        |
| AKG02     | DB-1760                                                   | fox                         | -     | -                                         | Luxembourg                     | neg        | no CI               |                  | neg          | neg                |                             | not tested     | neg                       | neg        |
| AKG03     | DB-1760                                                   | fox                         | -     | -                                         | Luxembourg                     | neg        | no CI               |                  | neg          | neg                |                             | neg            | neg                       | neg        |
| AKG04     | GS-5 lot 05-18 (1570)                                     | fox * mouse                 | RABV  | Competition Strain-W6                     | France                         | 2          | 1670                | High (15-25)     | neg          | neg                |                             | neg            | neg                       | neg        |
| AKG05     | GS-5 lot 05-18 (1570)                                     | fox * mouse                 | RABV  | Competition Strain-W6                     | France                         | 3          | 1630                | High (15-25)     | neg          | neg                |                             | neg            | neg                       | neg        |
| AKG06     | GS-7 lot 14-18                                            | fox * mouse                 | RABV  | Competition Strain-W6                     | France                         | 3          | 30                  | very High (5-15) | neg          | pos                |                             | (pos) Doubtful | neg                       | neg        |
| AKG07     | RABV Marne lot 12-17                                      | dog * mouse                 | RABV  | Competition Africa-1                      | Marocco                        | 3          | 1710                | High (15-25)     | neg          | pos                |                             | neg            | neg                       | neg        |
| AKG08     | Thomson lot 03-10                                         | fox * mouse                 | RABV  | Competition Strain-W6                     | Denmark                        | 3          | 1630                | High (15-25)     | neg          | pos                |                             | neg            | neg                       | neg        |
| AKG09     | DB-1770                                                   | rodent                      | RABV  | Acute Fox RV                              | Norway                         | 3          | 2620                | low              | neg          |                    |                             | neg            | neg                       | neg        |
| AKG10     | DB-0044                                                   | fox                         | RABV  | Competition Strain-01                     | Albania                        | 1          | 1640                | High (15-25)     | neg          | pos                |                             | neg            | neg                       | neg        |
| AKG11     | DB-1068                                                   | fox                         | RABV  | Vaccine strain                            | Hungary                        | 1          | 2160                | low              | neg          | neg                |                             | neg            | neg                       | neg        |
| AKG12     | DB-1027                                                   | cattle                      | RABV  | Vaccine strain                            | Romania                        | 2          | 1410                | very High (5-15) | neg          | pos                |                             | neg            | neg                       | neg        |
| AKG13     | DB-1120                                                   | fox                         | RABV  | Competition Strain-N02                    | Romania                        | 1          | 1630                | High (15-25)     | neg          | neg                |                             | neg            | neg                       | neg        |
| AKG14     | DB-1120                                                   | fox                         | RABV  | Competition Strain-N02                    | Romania                        | 2          | 1640                | High (15-25)     | neg          | neg                |                             | neg            | neg                       | neg        |
| AKG15     | DB-1160                                                   | cat                         | RABV  | Competition Strain-N02                    | Moldavia                       | 2          | 1730                | High (15-25)     | neg          | neg                |                             | neg            | neg                       | neg        |
| AKG16     | DB-1700                                                   | fox                         | RABV  | Competition Strain-C                      | Lithuania                      | 3          | 1140                | very High (5-25) | neg          | pos                |                             | neg            | neg                       | neg        |
| AKG17     | DB-0660                                                   | dog                         | RABV  | Competition Strain-01                     | Greece                         | 1          | 1660                | High (15-25)     | neg          | pos                |                             | neg            | neg                       | neg        |
| AKG18     | DB-0627                                                   | fox                         | RABV  | Competition Strain-01                     | Greece                         | 1          | 1820                | High (15-25)     | neg          | pos                |                             | neg            | neg                       | neg        |
| AKG19     | DB-0603                                                   | fox                         | RABV  | Competition Strain-01                     | Greece                         | 2          | 1910                | High (15-25)     | neg          | pos                |                             | neg            | neg                       | neg        |
| AKG20     | DB-0604                                                   | fox                         | RABV  | Competition Strain-01                     | Greece                         | 1          | 1860                | High (15-25)     | neg          | neg                |                             | neg            | neg                       | neg        |
| Italy     | 100V05403-01                                              | WILDCAT                     | RABV  | AFRICA-2                                  | BOTSWANA                       | 4          | 1720                | High (15-25)     | not tested   | pos                | pos                         | not tested     | neg                       | neg        |
| Italy     | 100V05403-01                                              | DOG                         | RABV  | COMBOPOLITAN (EX-AFRICA-1)                | BOTSWANA                       | 4          | 1610                | High (15-25)     | not tested   | pos                | pos                         | not tested     | neg                       | neg        |
| Italy     | 100V05403-01                                              | BOVINE                      | RABV  | COMBOPOLITAN (EX-AFRICA-1)                | BOTSWANA                       | 4          | 1430                | very High (5-15) | not tested   | pos                | pos                         | not tested     | neg                       | neg        |
| Italy     | RS12064-4                                                 | BOVINE                      | RABV  | COMBOPOLITAN (EX-AFRICA-1)                | UGANDA                         | 4          | 2020                | High (15-25)     | not tested   | neg                | pos                         | not tested     | neg                       | neg        |
| Italy     | RS12064-5                                                 | DOG                         | RABV  | COMBOPOLITAN (EX-AFRICA-1)                | UGANDA                         | 4          | 1665                | High (15-25)     | not tested   | neg                | pos                         | not tested     | neg                       | neg        |
| Italy     | RS12064-12                                                | DOG                         | RABV  | COMBOPOLITAN (EX-AFRICA-1)                | UGANDA                         | 4          | 2012                | High (15-25)     | not tested   | neg                | pos                         | not tested     | neg                       | neg        |
| Italy     | RS12116-8                                                 | BOVINE                      | RABV  | American indigenous (Jamprisa bat)        | Brazil                         | 4          | 2128                | High (15-25)     | not tested   | neg                | pos                         | not tested     | neg                       | neg        |
| Italy     | RS12116-17                                                | BOVINE                      | RABV  | American indigenous (Jamprisa bat)        | Brazil                         | 4          | 2114                | High (15-25)     | not tested   | neg                | pos                         | not tested     | neg                       | neg        |
| Italy     | RS12116-38                                                | BOVINE                      | RABV  | American indigenous (Jamprisa bat)        | Brazil                         | 4          | 2156                | High (15-25)     | not tested   | neg                | pos                         | not tested     | neg                       | neg        |
| Italy     | RS121249                                                  | mouse replicated (ex BAT)   | RABV  | American indigenous (Brazilian mouse bat) | Brazil                         | 4          | 2119                | High (15-25)     | not tested   | neg                | pos                         | not tested     | neg                       | neg        |
| Italy     | RS120603-5                                                | POTUS FLAVUS                | RABV  | American indigenous (Brazilian mouse bat) | Brazil                         | 4          |                     | not tested       | not tested   | pos                | pos                         | not tested     | neg                       | neg        |
| Italy     | 100V10001                                                 | FOX                         | RABV  | Italy 1                                   | Italy                          | 4          |                     | not tested       | neg          | neg                |                             | neg            | neg                       | neg        |
| Italy     | 100V10001                                                 | DOG                         | RABV  | Italy 2                                   | Italy                          | 4          | 2183                | High (15-25)     | not tested   | neg                | pos                         | not tested     | neg                       | neg        |
| Italy     | 100V10001                                                 | FOX                         | RABV  | Italy 3a                                  | Italy                          | 4          | 1610                | High (15-25)     | not tested   | neg                | pos                         | not tested     | neg                       | neg        |
| Italy     | 07V01820B-3                                               | DOGT                        | RABV  | AFRICA-2                                  | Mauritania                     | 4          |                     | not tested       | not tested   | pos                | pos                         | not tested     | neg                       | neg        |
| Italy     | 07V018007 (210)                                           | DOGT                        | RABV  | AFRICA-2                                  | Niger                          | 4          |                     | not tested       | not tested   | neg                | neg                         | not tested     | neg                       | neg        |
| Italy     | 180V0566-2                                                | DOG                         | RABV  | AFRICA-2                                  | Liberia                        | 4          |                     | not tested       | not tested   | neg                | pos                         | not tested     | neg                       | neg        |
| Italy     | 180V0566-4                                                | DOG                         | RABV  | AFRICA-2                                  | Liberia                        | 4          |                     | not tested       | not tested   | pos                | pos                         | not tested     | neg                       | neg        |
| Italy     | 180V0566-1                                                | DOG                         | RABV  | AFRICA-2                                  | Liberia                        | neg        | no CI               |                  | not tested   | neg                | neg                         | not tested     | neg                       | neg        |
| Italy     | RS12046-11                                                | DOG                         | RABV  | UGANDA                                    | neg                            | not tested |                     | not tested       | neg          | neg                |                             | neg            | neg                       | neg        |
| KM Israel | 101011                                                    | dog                         | RABV  | Competition (Middle East)                 | Israel                         | 4          | 1140                | very High (5-15) | neg          | pos                |                             | not tested     | not tested                |            |
| KM Israel | 101011                                                    | dog                         | RABV  | Competition (Middle East)                 | Israel                         | 4          | 1130                | very High (5-15) | neg          | pos                |                             | neg            | not tested                | not tested |
| KM Israel | 101011                                                    | Cattle                      | RABV  | Competition (Middle East)                 | Israel                         | 4          | 910                 | very High (5-15) | neg          | pos                |                             | pos            | not tested                | not tested |
| KM Israel | 101029                                                    | Sheep                       | RABV  | Competition (Middle East)                 | Israel                         | 4          | 1010                | very High (5-15) | neg          | pos                |                             | pos            | not tested                | not tested |
| KM Israel | 101040                                                    | Cat                         | RABV  | Competition (Middle East)                 | Israel                         | 4          | 1180                | very High (5-15) | neg          | pos                |                             | neg            | not tested                | not tested |
| KM Israel | 101040                                                    | Badger                      | RABV  | Competition (Middle East)                 | Israel                         | 4          | 1110                | very High (5-15) | neg          | pos                |                             | pos            | not tested                | not tested |
| KM Israel | 101055                                                    | Jackal                      | -     | -                                         | neg                            | no CI      |                     | neg              | neg          | neg                |                             | neg            | not tested                | not tested |
| KM Israel | 101047                                                    | Cat                         | -     | -                                         | neg                            | no CI      |                     | neg              | neg          | neg                |                             | neg            | not tested                | not tested |
| KM Israel | 101043                                                    | Dog                         | -     | -                                         | neg                            | no CI      |                     | neg              | neg          | neg                |                             | neg            | not tested                | not tested |
| KM Israel | 101027                                                    | Cattle                      | -     | -                                         | neg                            | no CI      |                     | neg              | neg          | neg                |                             | neg            | not tested                | not tested |
| CDC       | A10-0014                                                  | Sheep                       | NA    | NA                                        | Georgia, USA                   | neg        | no CI               |                  | Invalid test | neg                |                             | neg            | neg                       | neg        |
| CDC       | A10-0070                                                  | Raccoon                     | RABV  | Eastern Raccoon RV                        | Tennessee, USA                 | 4          | 2088                | High (15-25)     | neg          | pos (severe)       |                             | neg            | neg                       | neg        |
| CDC       | A10-0069                                                  | Skunk                       | RABV  | North Central Skunk RV                    | Tennessee, USA                 | 4          | 2177                | High (15-25)     | neg          | neg                |                             | neg            | neg                       | neg        |
| CDC       | A10-0484                                                  | Dog                         | RABV  | Coastal Dog (W-4) RV                      | Egypt (Brandslanted to US USA) | 4          | 2604                | low              | neg          | neg                |                             | neg            | neg                       | neg        |
| CDC       | A10-1140                                                  | Bovine                      | RABV  | Atlanta Gray Fox RV                       | Atlanta, USA                   | 4          | 2281                | High (15-25)     | neg          | neg                |                             | neg            | neg                       | neg        |
| CDC       | A10-1090                                                  | Dog                         | RABV  | Tasmania Brachycephalus (70 RV)           | Georgia, USA                   | 4          | 2197                | High (15-25)     | neg          | pos (severe)       |                             | neg            | neg                       | neg        |
| CDC       | A10-0719                                                  | Skull                       | RABV  | North Carolina Skunk RV                   | North Carolina, USA            | 4          | 2120                | High (15-25)     | neg          | neg                |                             | neg            | neg                       | neg        |
| CDC       | A10-0708                                                  | Cat                         | RABV  | Lancaster Canine RV                       | North Carolina, USA            | 4          | 2137                | low              | Invalid test | neg                |                             | neg            | neg                       | neg        |
| CDC       | A10-1120                                                  | Dog                         | RABV  | Eastern Raccoon RV                        | Delaware, USA                  | 4          | 2209                | High (15-25)     | neg          | neg                |                             | neg            | neg                       | neg        |
| CDC       | A17-3454                                                  | Fox                         | RABV  | South Central Skunk RV                    | Atlanta, USA                   | 4          | 2028                | High (15-25)     | Invalid test | neg                |                             | neg            | neg                       | neg        |
| CDC       | A10-0002                                                  | Raccoon                     | NA    | NA                                        | Kentucky, USA                  | neg        | no CI               |                  | neg          | neg                |                             | neg            | neg                       | neg        |
| CDC       | A10-1145                                                  | Dog                         | NA    | NA                                        | Virgin Islands (US Territory)  | neg        | no CI               |                  | neg          | neg                |                             | neg            | neg                       | neg        |
| CDC       | A10-2061                                                  | Raccoon                     | RABV  | Eastern Raccoon RV                        | Georgia, USA                   | 4          | 2032                | High (15-25)     | neg          | pos (severe)       |                             | neg            | neg                       | neg        |
| CDC       | A10-3206                                                  | Fox                         | RABV  | Acute Fox RV                              | Alaska, USA                    | 4          | 2125                | High (15-25)     | neg          | pos (severe)       |                             | neg            | neg                       | neg        |
| CDC       | A10-0488                                                  | Skunk                       | RABV  | Western Gray Fox RV                       | California, USA                | 4          | 2148                | High (15-25)     | neg          | neg                |                             | neg            | neg                       | neg        |
| CDC       | A17-4100                                                  | Fox                         | RABV  | Atlanta Gray Fox RV                       | Atlanta, USA                   | 4          | 2460                | High (15-25)     | neg          | neg                |                             | neg            | neg                       | neg        |
| CDC       | A17-4341                                                  | Dog                         | RABV  | Coastal Dog (W-4) RV                      | Egypt (Brandslanted to CT USA) | 4          | 2203                | High (15-25)     | neg          | pos (severe)       |                             | neg            | neg                       | neg        |
| CDC       | A17-3407                                                  | Fox                         | RABV  | South Central Skunk RV                    | New Mexico, USA                | 4          | 1931                | High (15-25)     | neg          | pos (severe)       |                             | neg            | neg                       | neg        |
| CDC       | A10-2020 (15-3408)                                        | Gray Fox                    | RABV  | Myotis up RV                              | Oregon, USA                    | 4          | 2162                | low              | Invalid test | (pos) Doubtful     |                             | neg            | neg                       | neg        |
| CDC       | A10-2015 (15-0012)                                        | Fox                         | RABV  | Myotis up RV                              | Oregon, USA                    | 4          | 2133                | low              | neg          | neg                |                             | neg            | neg                       | neg        |
| DNI       | 001019                                                    | Bovine                      | RABV  | Mongolian variant                         | Chicla, Free State, SA         | 3          | 2172                | High (15-25)     | neg          | pos                |                             | neg            | neg                       | neg        |
| DNI       | 001019                                                    | Mongolian                   | RABV  | Mongolian variant                         | Coligny, North West, SA        | 4          | 1141                | very High (5-15) | neg          | pos                |                             | pos            | neg                       | neg        |
| DNI       | 001019                                                    | Jackal                      | RABV  | canid variant                             | Krugersburg, North West, SA    | 4          | 2147                | High (15-25)     | neg          | pos                |                             | pos            | neg                       | neg        |
| DNI       | 001019                                                    | dog                         | RABV  | canid variant                             | Nels, Limpopo, SA              | 4          | 1055                | High (15-25)     | neg          | pos                |                             | neg            | neg                       | neg        |
| DNI       | 001019                                                    | Jackal                      | RABV  | canid variant                             | Nels, North West, SA           | 4          | 1185                | very High (5-15) | pos          | pos                |                             | neg            | neg                       | neg        |
| DNI       | 001019                                                    | dog                         | RABV  | canid variant                             | Pretoria, Limpopo, SA          | 4          | 1082                | very High (5-15) | neg          | pos                |                             | neg            | neg                       | neg        |
| DNI       | 076109                                                    | Bovine                      | RABV  | canid variant                             | Genova, North West, SA         | 4          | 2071                | High (15-25)     | neg          | pos                |                             | neg*           | neg                       | neg        |
| DNI       | 001019                                                    | Mooselet                    | RABV  | Mongolian variant                         | Ladysburg, Free State, SA      | 4          | 1116                | very High (5-15) | neg          | pos                |                             | neg            | neg                       | neg        |
| DNI       | 100110                                                    | dog                         | RABV  | canid variant                             | Norman, Mpumalanga, SA         | 4          | 2468                | High (15-25)     | neg          | pos                |                             | neg            | neg                       | neg        |
| DNI       | 101018                                                    | dog                         | RABV  | canid variant                             | Klerksburg, North West, SA     | 4          | 1011                | High (15-25)     | neg          | pos                |                             | neg            | neg                       | neg        |
| DNI       | 101018                                                    | skinn                       | RABV  | canid variant                             | Witbock, Namibia               | 4          | 1130                | very High (5-15) | neg          | pos                |                             | neg            | neg                       | neg        |
| DNI       | 101018                                                    | dog                         | RABV  | canid variant                             | Acromontgery, MP, SA           | 4          | 1121                | very High (5-22) | neg          | pos                |                             | neg            | neg                       | neg        |
| DNI       | 101018                                                    | bat Eared fox               | RABV  | canid variant                             | Karman, Northern Cape, SA      | 4          | 2089                | High (15-25)     | neg          | pos                |                             | neg            | neg                       | neg        |
| DNI       | 101018                                                    | dog                         | RABV  | canid variant                             | Madib, North West, SA          | 4          | 2088                | High (15-25)     | neg          | pos                |                             | neg            | neg                       | neg        |
| DNI       | 101018                                                    | dog                         | RABV  | canid variant                             | Taavon, Limpopo, SA            | 4          | 1074                | High (15-25)     | neg          | pos                |                             | neg            | neg                       | 1          |
| DNI       | 101018                                                    | dog                         | RABV  | canid variant                             | Roosburg, MP, SA               | 4          | 2013                | High (15-25)     | neg          | pos                |                             | neg            | neg                       | neg        |
| DNI       | 100110                                                    | dog                         | RABV  | canid variant                             | Muthaba, Limpopo, SA           | 4          | 2194                | low              | neg          | pos                |                             | neg            | neg                       | neg        |
| CNI       |                                                           |                             |       |                                           | neg                            | no CI      |                     | not tested       | neg          | neg                |                             | neg            | neg                       | neg        |
| CNI       |                                                           |                             |       |                                           | neg                            | no CI      |                     | not tested       | neg          | neg                |                             | neg            | neg                       | neg        |
| CNI       | V113 (01/07/02) University of Bern                        | dog                         | RABV  | Li London dog                             | Li London                      | 4          | 710                 | very High (5-15) | not tested   | +                  |                             | neg            | neg                       | neg        |
| CNI       | Q10-18-0017                                               | dog                         | RABV  | Acute Fox RV                              | Canada                         | 1          | 2010                | High (15-25)     | not tested   | neg                |                             | neg            | neg                       | neg        |
| CNI       | Q10-17-0072                                               | dog                         | RABV  | Acute Fox RV                              | Canada                         | 1          | 1700                | High (15-25)     | not tested   | neg                |                             | neg            | neg                       | neg        |
| CNI       | Q10-17-00710                                              | dog                         | RABV  | Acute Fox RV                              | Canada                         | 1          | 1820                | High (15-25)     | not tested   | neg                |                             | neg            | neg                       | neg        |
| CNI       | V120 (01/07/02) University of Bern                        | dog                         | RABV  | Nepal dog                                 | Nepal                          | 3          | 610                 | very High (5-15) | not tested   | +                  |                             | +              | neg                       | neg        |
| CNI       | V003 (Africa Central Veterinary Lab, Weybridge GB)        | yellow mongoose (BMP pair)  | RABV  | Africa mongoose                           | ISA                            | 4          | 770                 | very High (5-15) | not tested   | +                  |                             | +              | neg                       | neg        |
| CNI       | V120 (01/07/02) Texas Department of State Health Services | coyote (BMP pair)           | RABV  | Mexican dog/lycote                        | Mexico                         | 4          | 630                 | very High (5-15) | not tested   | +                  |                             | +              | neg                       | neg        |
| CNI       | Q10-18-01002                                              | dog                         | RABV  | Acute Fox RV                              | Canada                         | 3          | 970                 | very High (5-15) | not tested   | +                  |                             | +              | neg                       | neg        |
| CNI       | Q10-18-0060                                               | skunk                       | RABV  | MSA-M2                                    | Canada                         | 4          | 1140                | very High (5-15) | not tested   | +                  |                             | +              | neg                       | neg        |
| CNI       | Q10-18-0062                                               | skunk                       | RABV  | MSA-M6                                    | Canada                         | 4          | 1180                | very High (5-15) | not tested   | neg                |                             | neg            | neg                       | neg        |
| CNI       | V127 (00/02/02) Spangenberg National University, Rome     | recocon dog                 | RABV  | Rome recocon dog                          | Rome                           | 4          | 1200                | very High (5-15) | not tested   | +                  |                             | neg            | neg                       | neg        |
| CNI       | V003 (07/07/02) California Department of Public Health    | striped skunk               | RABV  | California skunk                          | USA                            | 3          | 1610                | High (15-25)     | not tested   | +                  |                             | +              | neg                       | neg        |
| CNI       | V003 (Zoonosis Central Center Sao Paulo Brazil 1987)      | dog                         | RABV  | BL-1a                                     | Brazil                         | 3          | 1660                | very High (5-15) | not tested   | +                  |                             | +              | neg                       | neg        |
| CNI       | V003 (Zoonosis Central Center Sao Paulo Brazil 1987)      | Histiotus velatus (M0 pair) | RABV  | BL-2                                      | Brazil                         | 3          | 1480                | very High (5-15) | not tested   | +                  |                             | neg            | neg                       | neg        |
| CNI       | V003 (Zoonosis Central Center Sao Paulo Brazil 1987)      | herne                       | RABV  | BL-3                                      | Brazil                         | 1          | 1680                | High (15-25)     | not tested   | neg                |                             | neg            | neg                       | neg        |
| CNI       | Q10-16-00070                                              | raccoon                     | RABV  | Multimeric Raccoon                        | Canada                         | 3          | 980                 | very High (5-15) | not tested   | +                  |                             | neg            | neg                       | neg        |
| CNI       | Q10-17-00101                                              | raccoon                     | RABV  | Multimeric Raccoon                        | Canada                         | 3          |                     |                  |              |                    |                             |                |                           |            |
